# Supplementary material
Source: PubMed Central journal article supplement (PMC4233119)
Supplement: NIHMS635139-supplement-3.pdf [file NIHMS635139-supplement-3.pdf]

Figure S2

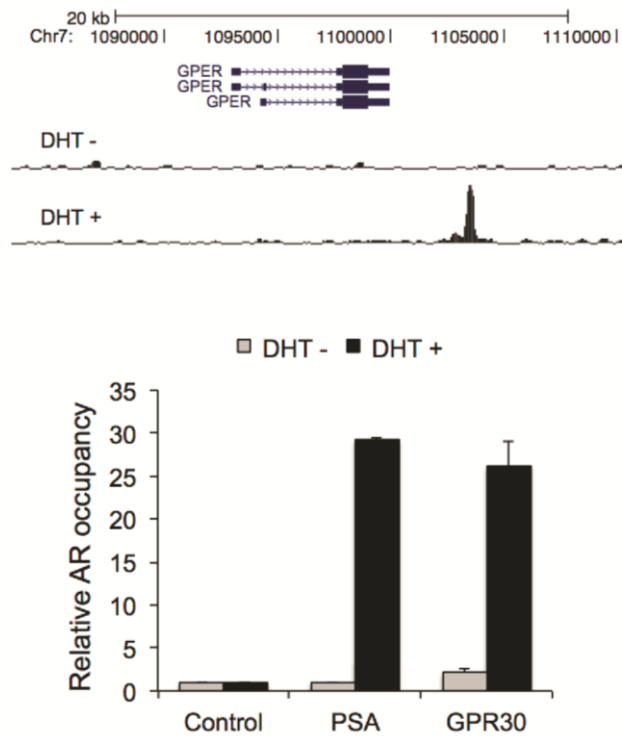

ChIP-sequencing results showing AR binding to the GPER (GPR30) locus after 4h DHT treatment in LNCaP cells (upper panel) and ChIP-qPCR analyses were conducted to confirm the ChIP-sequencing results (lower panel). The PSA enhancer was used as a positive control. AR occupancy at the negative control region was defined as 1. ChIP, chromatin immunoprecipitation.
